# Supplementary material for: The nature of excited states in dipolar donor/fullerene complexes for organic solar cells: evolution with the donor stack size
Source: Royal Society of Chemistry journal article supplement (doi:10.1039/c6cp02296k), 2016-01-01
Supplement: c6cp02296k1.pdf [file c6cp02296k1.pdf]

## Electronic Supplementary Information

# The Nature of Excited States in Dipolar Donor/Fullerene Complexes for Organic Solar Cells: Evolution with the Donor Stack Size

*Xingxing Shen,<sup>1,2</sup> Guangchao Han,<sup>1,2</sup> Yuanping Yi<sup>1,\*</sup>*

<sup>1</sup>Beijing National Laboratory for Molecular Sciences, CAS Key Laboratory of  
Organic Solids, Institute of Chemistry, Chinese Academy of Sciences, Beijing 100190,  
China

<sup>2</sup>University of Chinese Academy Sciences, Beijing 100049, China

## Contents

**Figure S1.** (a) Chemical structures of DTDCTB and C<sub>60</sub> and (b) Illustrations of the two kinds of cofacial intermolecular  $\pi$ - $\pi$  stacking (I and II) in DTDCTB crystal and donor-acceptor interfacial geometry (DA<sub>CC</sub> and DA<sub>H</sub>).

**Figure S2.** Natural transition orbitals of (a) the lowest *dd*CT state and (b) the lowest dark EX state in DTDCTB clusters.

**Figure S3.** The frontier molecular orbitals of *n*DTDCTB/C<sub>60CC</sub> complexes.

**Figure S4.** The structures (a) and frontier molecular orbitals (b) of *n*DTDCTB/C<sub>60H</sub> complexes.

**Figure S5.** Energy levels of frontier molecular orbitals and IP and EA values for the *n*DTDCTB/C<sub>60H</sub> complexes.

**Figure S6.** Energy level of (a) the EX states and the *dd*CT states between adjacent DTDCTB molecules and (b) donor-to-acceptor CT states in *n*DTDCTB/C<sub>60H</sub> complexes.

**Figure S7.** The oscillator strengths of the lowest bright EX states in complexes.

**Figure S8.** Natural transition orbitals of the lowest EX state with a large oscillator strength in *n*DTDCTB/C<sub>60H</sub> complexes.

**Figure S9.** Natural transition orbitals of the lowest dark EX states of (a) *n*DTDCTB/C<sub>60CC</sub> and (b) *n*DTDCTB/C<sub>60H</sub> complexes.

**Figure S10.** Natural transition orbitals of the lowest *dd*CT states of (a) *n*DTDCTB/C<sub>60CC</sub> and (b) *n*DTDCTB/C<sub>60H</sub> complexes.

**Figure S11.** Natural transition orbitals of the lowest  $\alpha$ CT,  $\beta$ CT,  $\gamma$ CT states in (a) 1~3DTDCTB/C<sub>60CC</sub> and (b) 1~3DTDCTB/C<sub>60H</sub> complexes.

**Figure S12.** Natural transition orbitals of the lowest  $\alpha$ CT,  $\beta$ CT,  $\gamma$ CT,  $\delta$ CT states in complex 4DTDCTB/C<sub>60H</sub>.

**Table S1.** The electronic couplings for hole transfer, electron transfer and charge recombination, and binding energies for dimers I, II, DA<sub>CC</sub>, and DA<sub>H</sub> calculated by DFT using the B3LYP and tuned- $\omega$ B97X functionals with different basis sets.

**Table S2.** The optimized range-separation parameters of DTDCTB clusters and *n*DTDCTB/C<sub>60</sub> complexes.

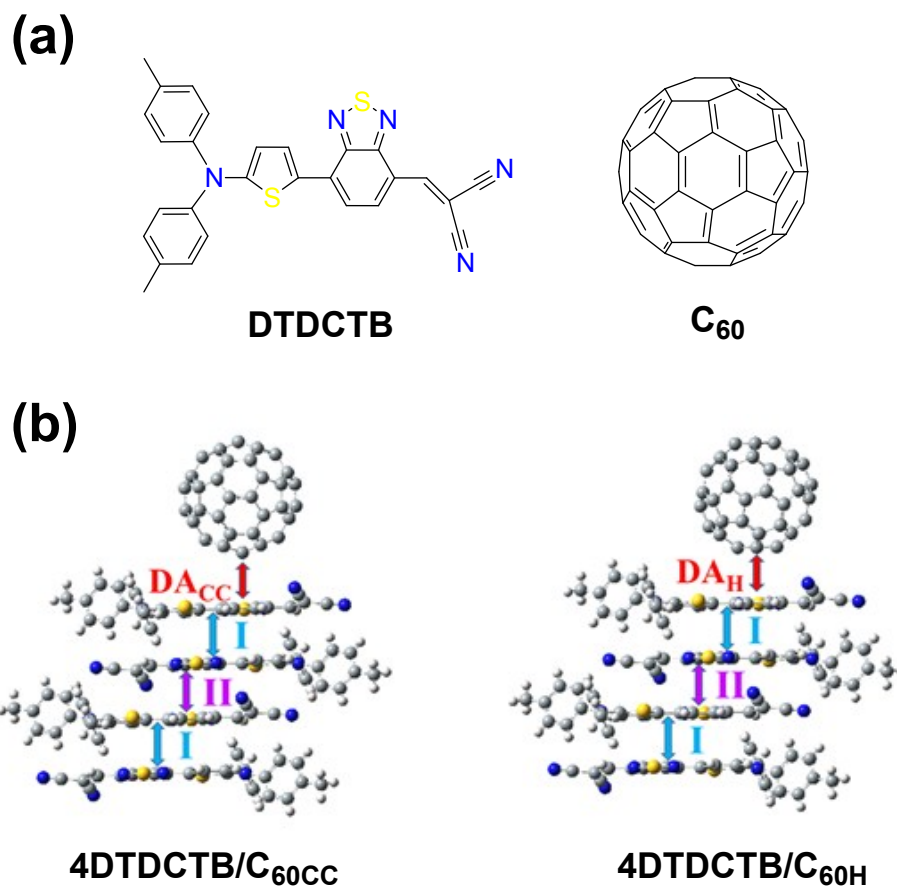

**Figure S1.** (a) Chemical structures of DTDCTB and C<sub>60</sub> and (b) Illustrations of the two kinds of cofacial intermolecular  $\pi$ - $\pi$  stacking (I and II) in DTDCTB crystal and donor-acceptor interfacial geometry (DA<sub>CC</sub> and DA<sub>H</sub>).

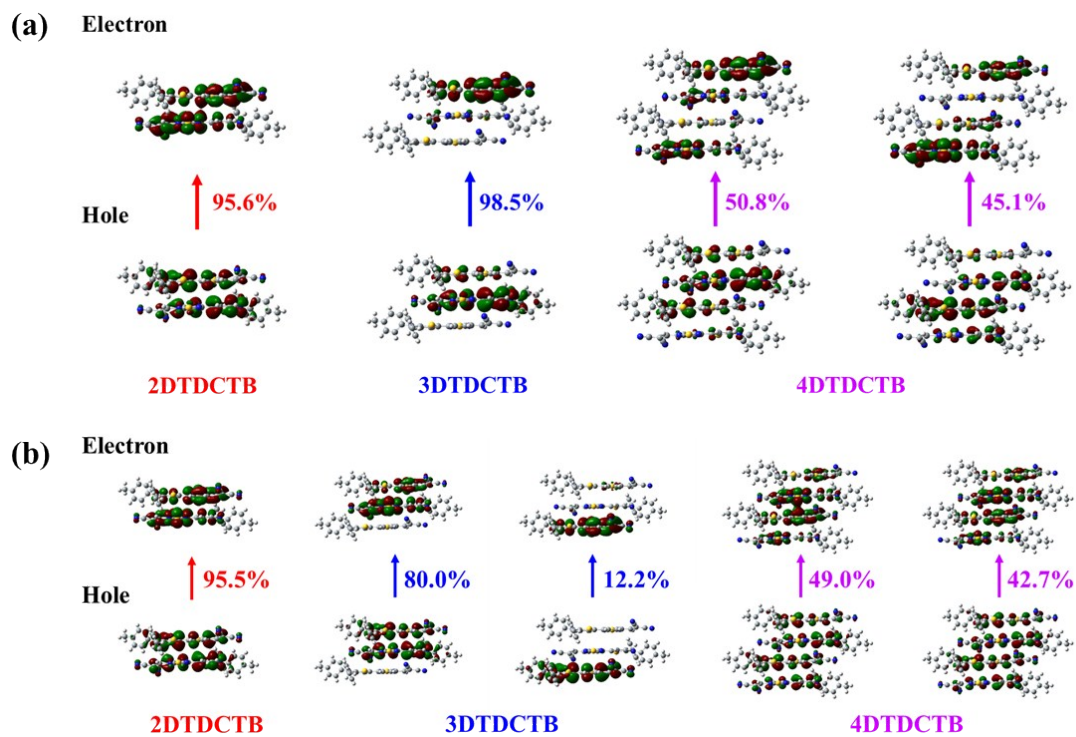

**Figure S2.** Natural transition orbitals of (a) the lowest *ddCT* state and (b) the lowest dark EX state in DTDCTB clusters. The weight of the hole-electron contribution to the excitation also included.

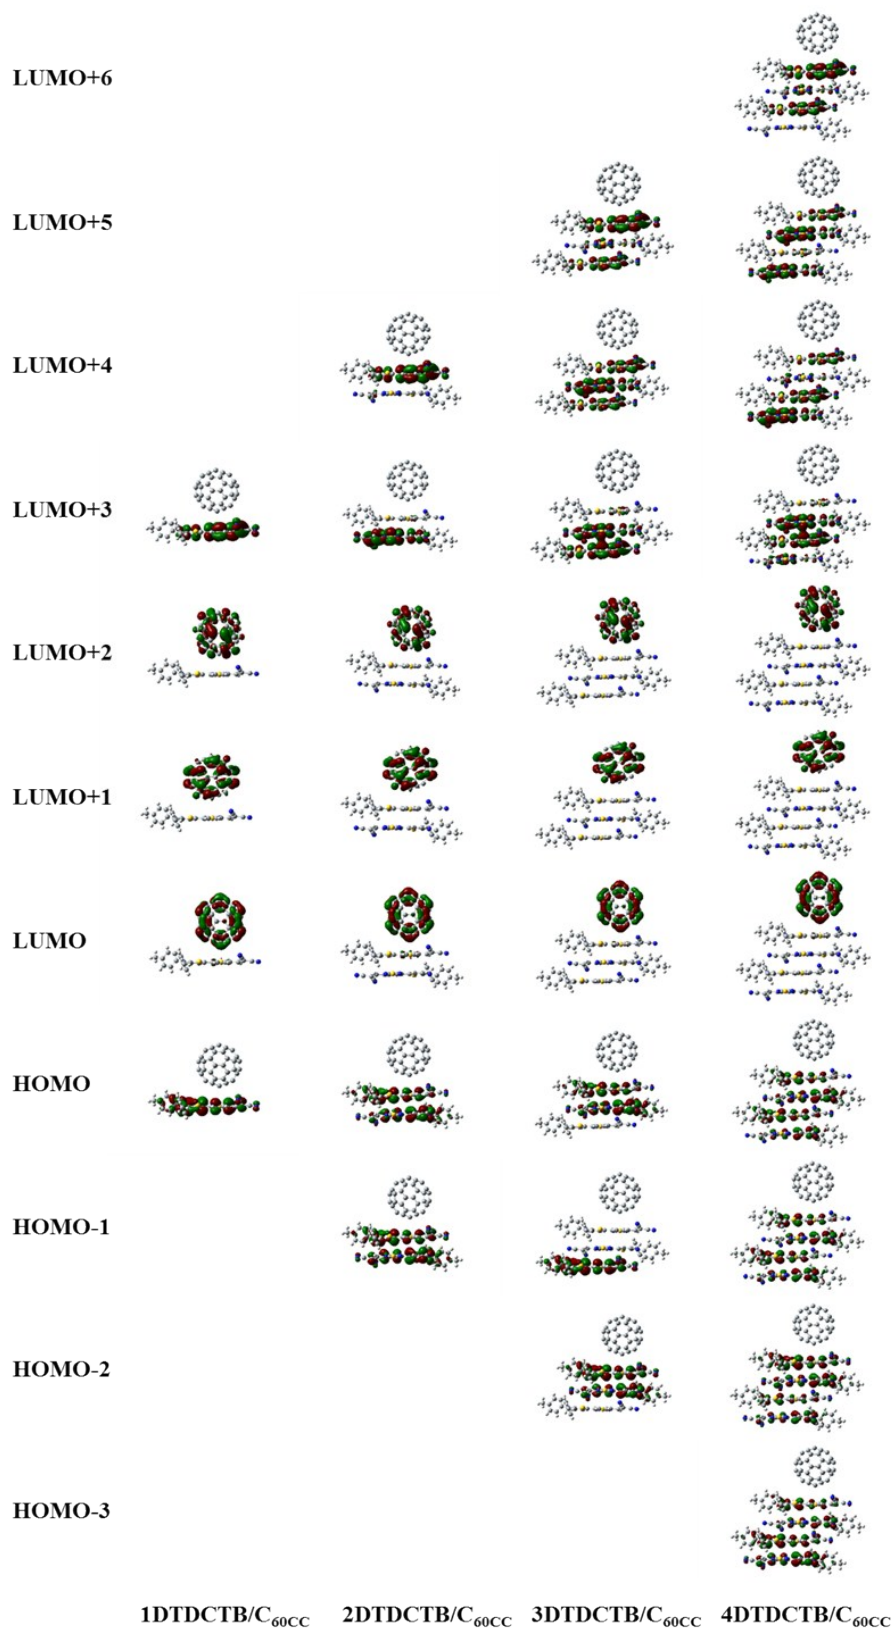

**Figure S3.** The frontier molecular orbitals of  $n$ DTDCTB/C<sub>60CC</sub> complexes.

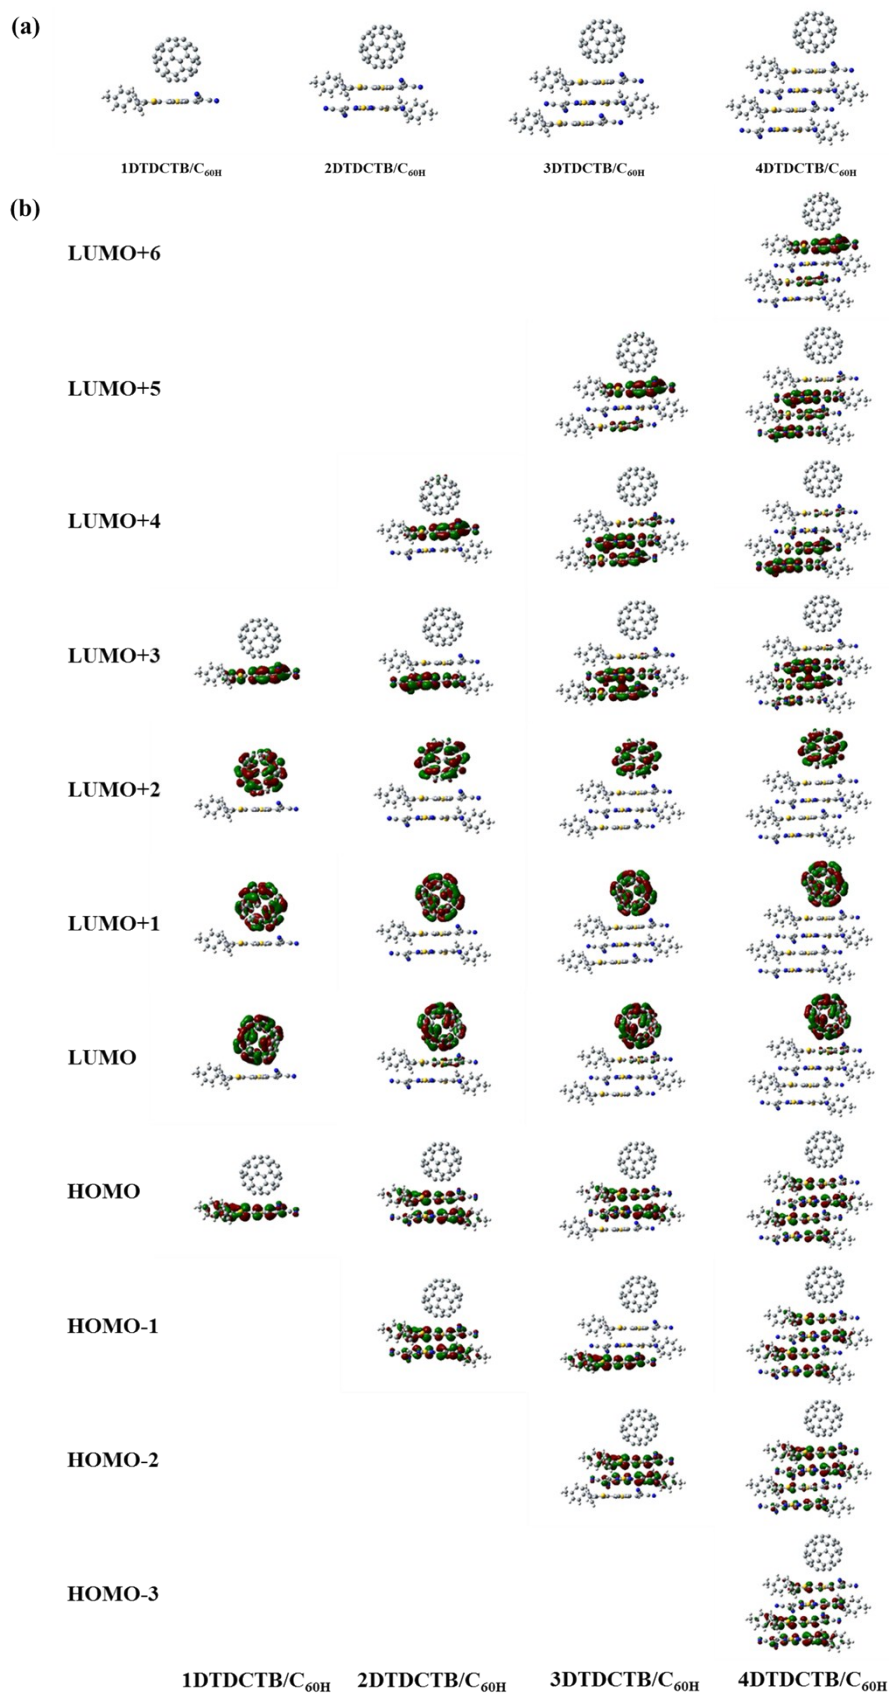

**Figure S4.** The structures (a) and frontier molecular orbitals (b) of  $n$ DTDCTB/C<sub>60H</sub> complexes.

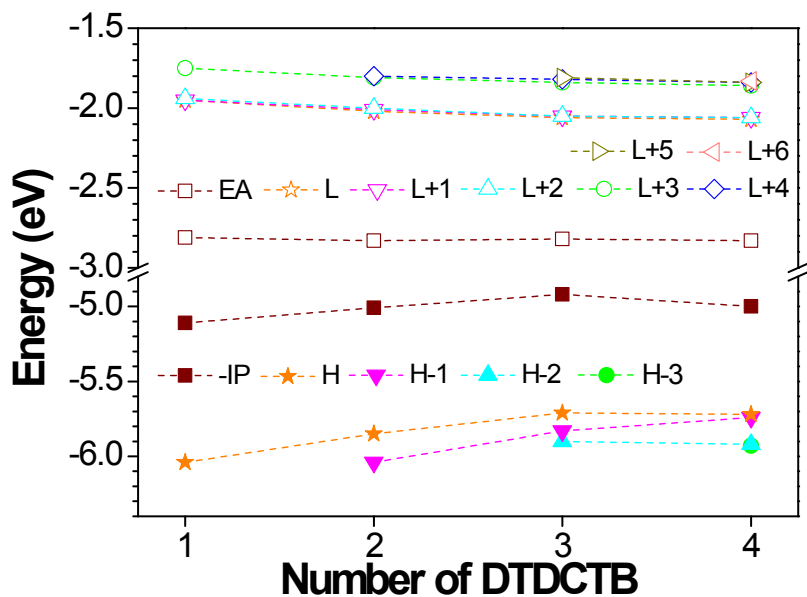

**Figure S5.** Energy levels of frontier molecular orbitals and IP and EA values for the  $n$ DTDCTB/ $C_{60H}$  complexes (H and L denote HOMO and LUMO, respectively).

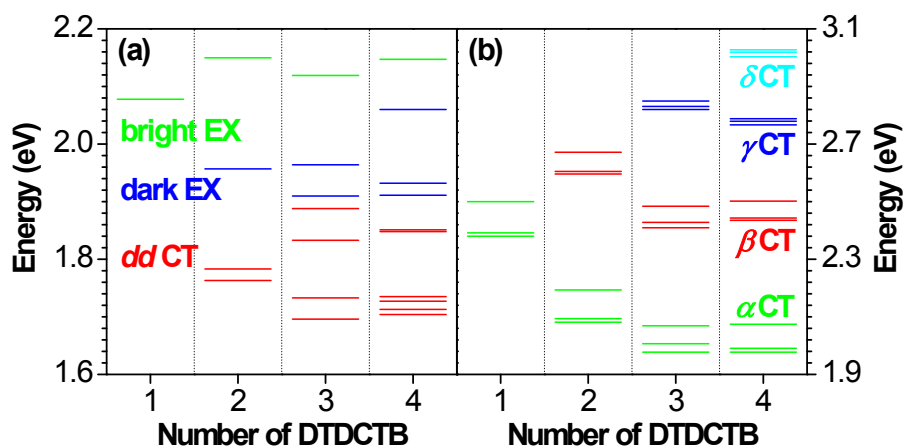

**Figure S6.** Energy level of (a) the EX states and the  $ddCT$  states between adjacent DTDCTB molecules and (b) donor-to-acceptor CT states in  $n$ DTDCTB/ $C_{60H}$  complexes.

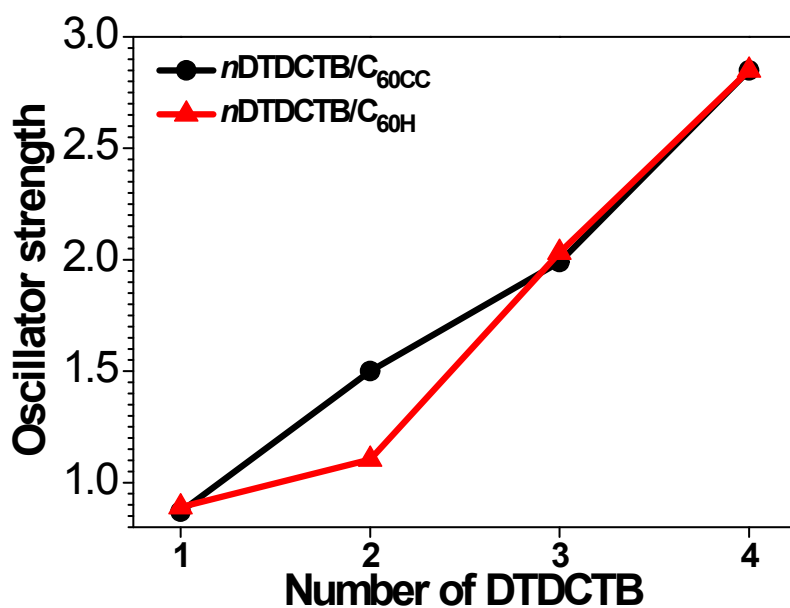

Figure S7. The oscillator strengths of the lowest bright EX states in complexes.

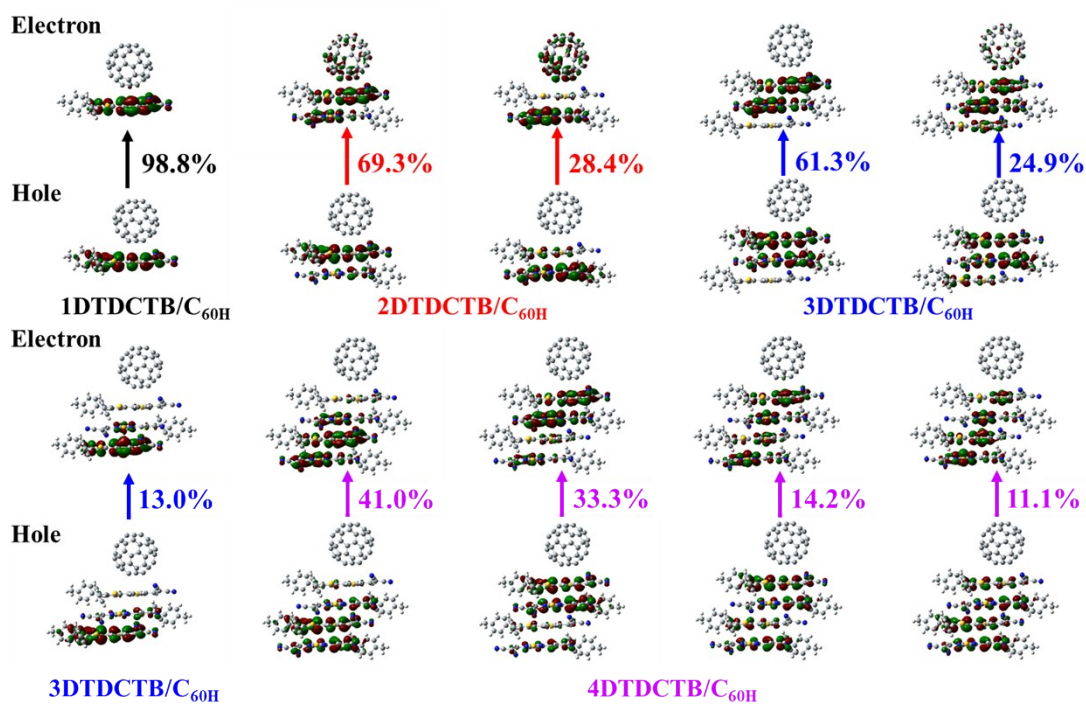

Figure S8. Natural transition orbitals of the lowest EX state with a large oscillator strength in  $n$ DTDCTB/ $C_{60H}$  complexes. The weight of the hole-electron contribution to the excitation also included.



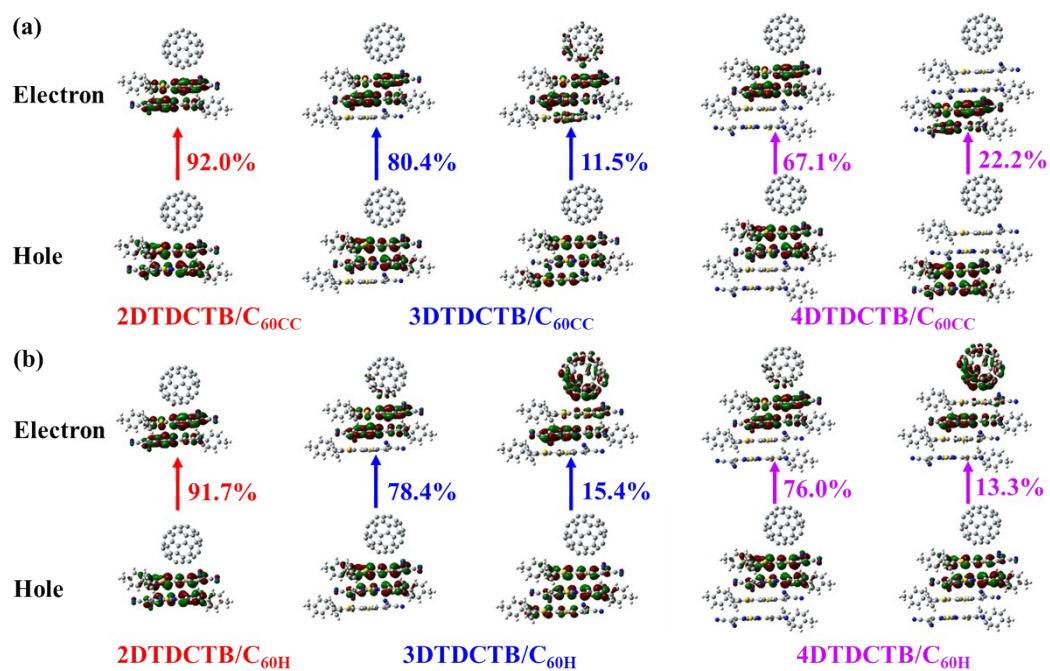

**Figure S9.** Natural transition orbitals of the lowest dark EX states of (a)  $n$ DTDCTB/C<sub>60CC</sub> and (b)  $n$ DTDCTB/C<sub>60H</sub> complexes. The weight of the hole-electron contribution to the excitation also included.

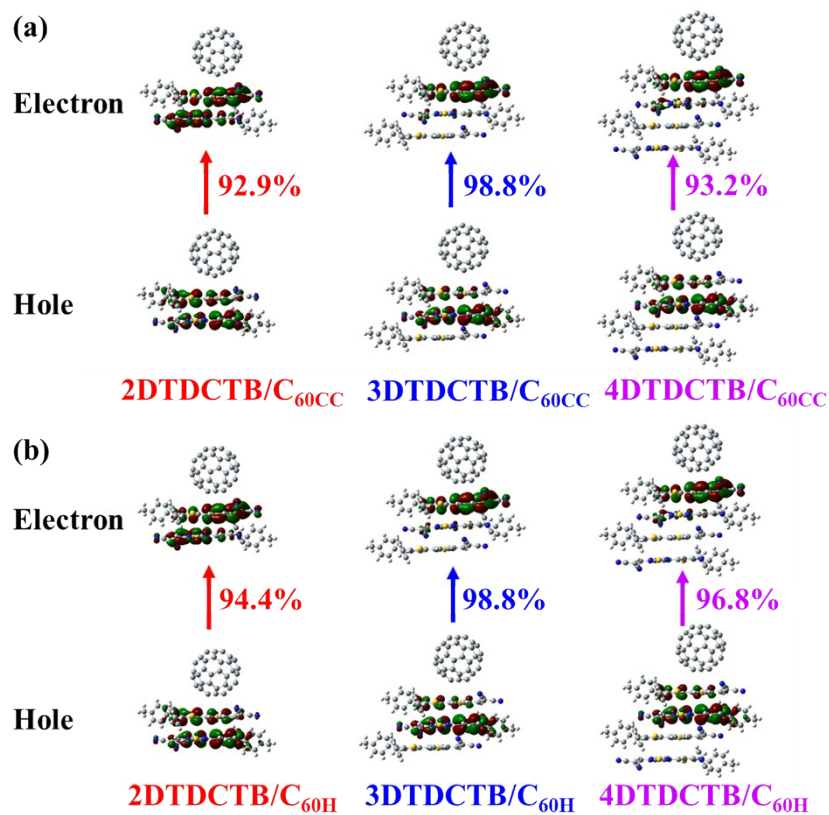

**Figure S10.** Natural transition orbitals of the lowest  $dd$ CT states of (a)  $n$ DTDCTB/C<sub>60CC</sub> and (b)  $n$ DTDCTB/C<sub>60H</sub> complexes. The weight of the hole-electron contribution to the excitation also included.

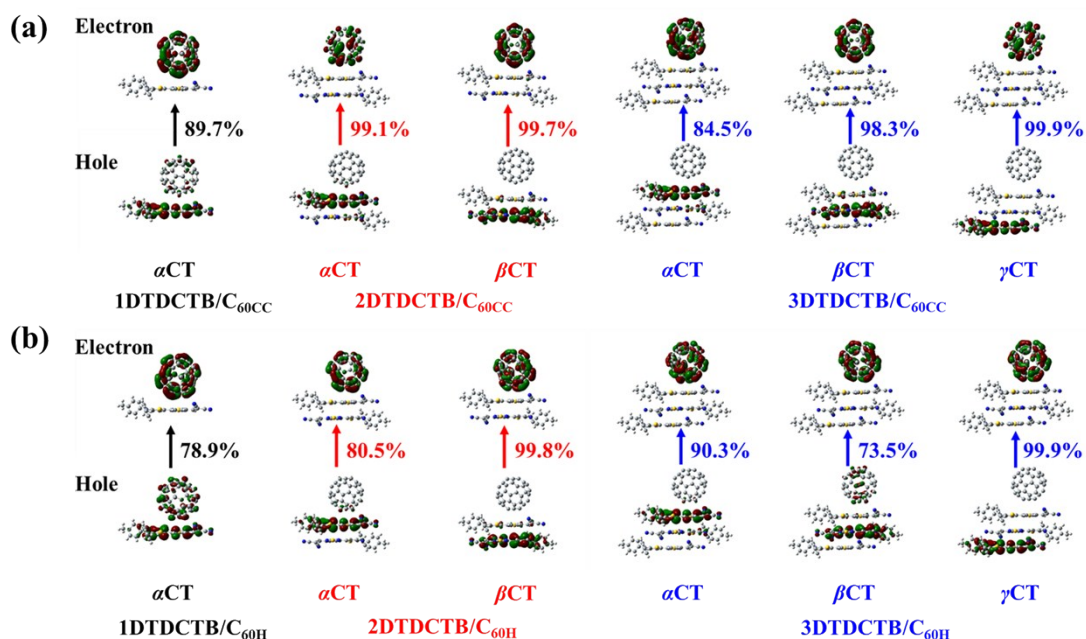

**Figure S11.** Natural transition orbitals of the lowest  $\alpha$ CT,  $\beta$ CT,  $\gamma$ CT states in (a) 1~3DTDCTB/ $C_{60CC}$  and (b) 1~3DTDCTB/ $C_{60H}$  complexes. The weight of the hole-electron contribution to the excitation also included.

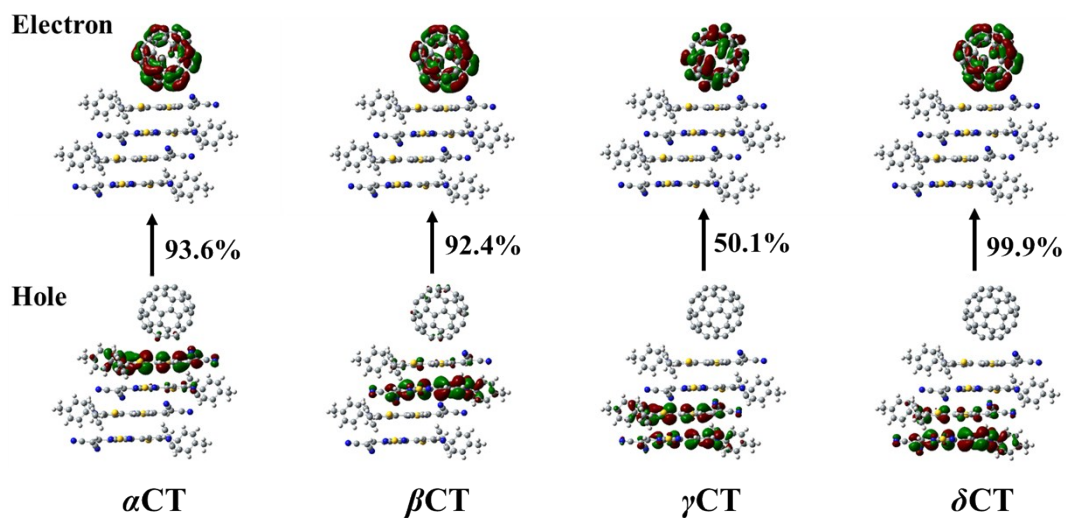

**Figure S12.** Natural transition orbitals of the lowest  $\alpha$ CT,  $\beta$ CT,  $\gamma$ CT,  $\delta$ CT states in complex 4DTDCTB/ $C_{60H}$ . The weight of the hole-electron contribution to the excitation also included.

**Table S1.** The electronic couplings (in meV) for hole transfer ( $t_h$ ), electron transfer ( $t_e$ ) and charge recombination ( $t_R$ ), and binding energies ( $E_b$ , in kcal/mol) for dimers I, II,  $DA_{CC}$ , and  $DA_H$  calculated by DFT using the B3LYP and tuned- $\omega$ B97X functionals with different basis sets.

| <b>B3LYP/(6-31G*, 6-31G**, 6-311G**)</b>                         |                  |                  |                  |                     |
|------------------------------------------------------------------|------------------|------------------|------------------|---------------------|
|                                                                  | $t_h$            | $t_e$            | $t_R$            | $E_b$               |
| <b>I</b>                                                         | 79.9, 79.7, 82.9 | 21.8, 21.2, 21.0 | 28.3, 29.2, 34.5 | -21.2, -21.2, -21.9 |
| <b>II</b>                                                        | 28.3, 28.5, 29.7 | 12.7, 12.9, 15.5 | 25.8, 25.4, 24.6 | -20.1, -20.1, -21.0 |
| <b><math>DA_{CC}</math></b>                                      | 15.4, 15.4, 16.1 | 36.3, 36.0, 34.1 | 15.9, 15.8, 16.4 | —                   |
| <b><math>DA_H</math></b>                                         | 16.7, 16.7, 16.2 | 25.2, 25.1, 26.8 | 40.2, 40.1, 42.5 | —                   |
| <b>tuned-<math>\omega</math>B97X/(6-31G*, 6-31G**, 6-311G**)</b> |                  |                  |                  |                     |
|                                                                  | $t_h$            | $t_e$            | $t_R$            | $E_b$               |
| <b>I</b>                                                         | 85.6, 85.3, 88.7 | 19.3, 18.6, 16.6 | 54.3, 56.0, 65.5 | -20.5, -20.6, -22.1 |
| <b>II</b>                                                        | 27.9, 28.2, 29.4 | 4.9, 5.0, 5.5    | 49.8, 49.1, 49.5 | -18.9, -18.9, -21.0 |
| <b><math>DA_{CC}</math></b>                                      | 16.4, 16.3, 17.6 | 38.5, 38.2, 37.2 | 24.8, 24.7, 26.8 | —                   |
| <b><math>DA_H</math></b>                                         | 17.7, 17.6, 17.5 | 29.8, 29.7, 32.4 | 64.9, 64.7, 70.6 | —                   |

<sup>a</sup> Considering the degeneracy of HOMO and LUMO in  $C_{60}$ , the effective electronic couplings are calculated for  $DA_{CC}$  and  $DA_H$ .

**Table S2.** The optimized range-separation parameters ( $\omega$ ) of DTDCTB clusters and nDTDCTB/ $C_{60}$  complexes.

|          | 1DTDCTB           | 2DTDCTB           | 3DTDCTB           | 4DTDCTB           |
|----------|-------------------|-------------------|-------------------|-------------------|
| $\omega$ | 0.14              | 0.12              | 0.10              | 0.10              |
|          | 1DTDCTB/ $C_{60}$ | 2DTDCTB/ $C_{60}$ | 3DTDCTB/ $C_{60}$ | 4DTDCTB/ $C_{60}$ |
| $\omega$ | 0.13              | 0.11              | 0.10              | 0.10              |
